# Supplementary material
Source: PubMed Central journal article supplement (PMC7141079)

## **Supplemental Material**

Table S1: Uni- and multivariable Cox Regression model for the risk of AD or RCA:\*

|                       | Univariable |                   |                  | Multivariable |                  |              |
|-----------------------|-------------|-------------------|------------------|---------------|------------------|--------------|
|                       | HR          | 95%CI             | p-value          | HR            | 95%CI            | p-value      |
| Age                   | 1.04        | 1.01-1.07         | 0.019            | 1.01          | 0.98-1.05        | 0.586        |
| Sex                   | 0.43        | 0.17-1.08         | 0.074            | 0.63          | 0.24-1.64        | 0.341        |
| BMI                   | 0.98        | 0.92-1.04         | 0.459            |               |                  |              |
| ICM                   | 2.52        | 1.35-4.71         | 0.004            | 1.00          | 0.47-2.16        | 0.994        |
| DCM                   | 0.91        | 0.49-1.70         | 0.764            |               |                  |              |
| <b>HTN</b>            | <b>3.49</b> | <b>1.09-11.21</b> | <b>0.035</b>     | <b>2.82</b>   | <b>0.84-9.46</b> | <b>0.093</b> |
| DM                    | 1.70        | 0.97-2.95         | 0.065            | 1.39          | 0.77-2.50        | 0.279        |
| CKD                   | 0.95        | 0.48-1.90         | 0.891            |               |                  |              |
| Syncope               | 2.03        | 1.16-3.69         | 0.021            | 1.03          | 0.52-2.04        | 0.937        |
| <b>ICD</b>            | <b>4.72</b> | <b>2.59-8.59</b>  | <b>&lt;0.001</b> | <b>3.44</b>   | <b>1.69-7.01</b> | <b>0.001</b> |
| CRT                   | 1.15        | 0.52-2.55         | 0.728            |               |                  |              |
| LVEF ≤35              | 2.16        | 1.21-3.84         | 0.009            | 1.23          | 0.64-2.39        | 0.536        |
| ACE/ARB               | 5.80        | 0.80-41.93        | 0.082            | 1.40          | 0.18-10.94       | 0.750        |
| Beta blocker          | 1.00        | 0.47-2.13         | 0.991            |               |                  |              |
| <b>Diuretics</b>      | <b>2.67</b> | <b>1.40-5.08</b>  | <b>0.003</b>     | <b>1.74</b>   | <b>0.84-3.57</b> | <b>0.134</b> |
| Amiodaron             | 1.91        | 1.02-3.58         | 0.042            | 1.30          | 0.67-2.51        | 0.444        |
| Sotalol               | 2.00        | 0.72-5.53         | 0.184            |               |                  |              |
| NYHA III              | 2.69        | 1.43-5.06         | 0.002            | 1.46          | 0.73-2.90        | 0.283        |
| <b>QRS &gt;0.12 s</b> | <b>2.63</b> | <b>1.53-4.52</b>  | <b>&lt;0.001</b> | <b>2.37</b>   | <b>1.28-4.39</b> | <b>0.006</b> |

\* AD = arrhythmic death, ACE = angiotensin converting enzyme inhibitors, ARB = angiotensin II receptor blockers, BMI = body mass index, CI = confidence interval, CKD = chronic kidney disease, CRT = cardiac resynchronization therapy, DCM = dilated cardiomyopathy, DM = diabetes mellitus, LVEF = left ventricular ejection fraction, HR = hazard ratio, HTN = hypertension, ICM = ischemic cardiomyopathy, ICD = implantable cardioverter-defibrillator, NYHA = New York heart association, RCA = resuscitated cardiac arrest;

Table S2: Cox regression model after adjustment for hypertension, implanted ICD, treatment with diuretics and QRS duration >0.12sec:\*

|                | HR          | 95%CI            | p-value          |
|----------------|-------------|------------------|------------------|
| DIA_N          | 0.42        | 0.06-3.21        | 0.405            |
| <b>DIA_I</b>   | <b>0.41</b> | <b>0.23-0.71</b> | <b>0.002</b>     |
| DIA_II         | 1.03        | 0.50-2.16        | 0.930            |
| <b>DIA_III</b> | <b>3.52</b> | <b>2.00-6.22</b> | <b>&lt;0.001</b> |

\* CI = confidence interval, DIA\_N = normal diastolic function, DIA\_I = diastolic dysfunction grade one, DIA\_II = diastolic dysfunction grade two, DIA\_III = diastolic dysfunction grade three, HR = hazard ratio, ICD = implantable cardioverter-defibrillator

**Figure S1:** Overview of the primary and secondary outcome parameter in the overall study population (ICD = implantable cardioverter-defibrillator, RCA = resuscitated cardiac arrest, VT = ventricular tachycardia).

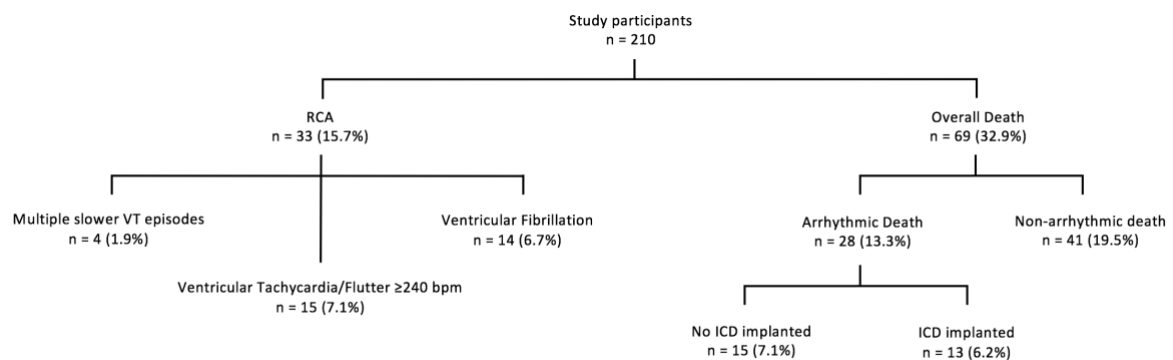

Supplement: NIHMS1549832-supplement-007757_-_Supplemental_Material.pdf [file NIHMS1549832-supplement-007757_-_Supplemental_Material.pdf]
